# Supplementary material for: [Pd 2 (η 4 -P 7 ) 2 ] 4− : a Pd 2 sandwiched by two anionic nortricyclane-type polyphosphides
Source: Royal Society of Chemistry journal article supplement (doi:10.1039/d5dt02437d), 2025-12-08
Supplement: d5dt02437d1.pdf [file d5dt02437d1.pdf]

## Supplementary Information

# $[\text{Pd}_2(\eta^4\text{-P}_7)_2]^{4-}$ : a $\text{Pd}_2$ dimer sandwiched by two anionic nortricyclane-type polyphosphide

Minghao Deng<sup>a</sup>, Xinyue Wang<sup>a</sup>, Yu Tang<sup>a, \*</sup>, Fuxing Pan<sup>a, \*</sup>

<sup>a</sup> State Key Laboratory of Applied Organic Chemistry, Key Laboratory of Nonferrous Metal Chemistry and Resources Utilization of Gansu Province, College of Chemistry and Chemical Engineering, Lanzhou University, Lanzhou, 730000 China

### Contents:

1. Synthesis Details
2. Single-Crystal X-Ray Crystallography (SCXRD)
3. Energy Dispersive Spectrometer (EDS) Analysis
4. References for the Supplementary Information

---

\* Corresponding author.

E-mail address: [tangyu@lzu.edu.cn](mailto:tangyu@lzu.edu.cn)

\* Corresponding author.

E-mail address: [panfx@lzu.edu.cn](mailto:panfx@lzu.edu.cn)

## 1 Experimental Session

### 1.1 General

All steps of synthesis and sample preparation were carried out inside an argon-filled glove box (MBraun,  $p(\text{H}_2\text{O}), p(\text{O}_2) < 0.1$  ppm). Sodium (Na, rods, 99 %),  $[\text{Pd}(\text{PPh}_3)_4]$  (99.9 %) and red phosphorus (P, powder, 98.5 %) were used without any further purification. DMF (99.8 %) were freshly distilled by  $\text{CaH}_2$  prior to use, and stored in argon prior to use. THF (99.8 %) was distilled from sodium/benzophenone under argon and stored under argon. Crypt-222<sup>[1]</sup> (98 %) was dried in vacuo for at least 18 hours. The precursors  $\text{Na}_3\text{P}_7$  was prepared according to a previously reported synthetic procedure from a mixture of the elements heated at 750 K for 3 days in sealed niobium containers.<sup>[2]</sup>

### 1.2 Synthesis of $[\text{Na}(\text{crypt-222})]_4[\text{Pd}_2\text{P}_{14}]$

$\text{Na}_3\text{P}_7$  (60 mg, 0.200 mmol), crypt-222 (80 mg, 0.210 mmol) and  $[\text{Pd}(\text{PPh}_3)_4]$  (242.58mg, 0.200 mmol) were dissolved in 3 ml DMF and stirred for 4 h to yield a dark brown solution. The resulting dark brown solution was filtered, then carefully layered by 3 ml THF. After 7 days, dark red crystals of  $[\text{Na}(\text{crypt-222})]_4[\text{Pd}_2\text{P}_{14}]$  were observed in the test tube in approximately 10% yield overall.

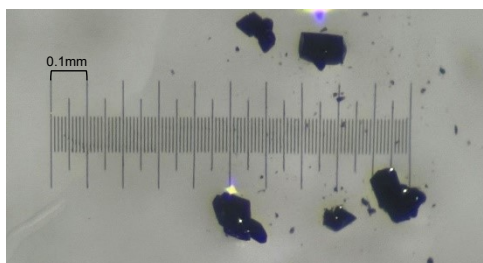

**Figure S1.** Crystal photographs of  $[\text{Na}(\text{crypt-222})]_4[\text{Pd}_2\text{P}_{14}]$  taken under a light microscope.

## 2 Single-Crystal X-Ray Crystallography (SCXRD)

### 2.1 Single-Crystal X-ray Diffraction

A metallic reddish red, block-shaped crystal was mounted on the goniometer. Data for  $[\text{Na}(\text{crypt-222})]_4[\text{Pd}_2\text{P}_{14}]$  were collected from a shock-cooled single crystal at 150.00 K on a Bruker D8 VENTURE Dual Wavelength with a PHOTON III CAPD detector. The diffractometer used  $\text{MoK}_\alpha$  radiation ( $\lambda = 0.71073$  Å). All data were integrated with SAINT V8.40B and a multi-scan absorption correction using was applied. The structure was solved by direct methods with SHELXT 2018/2 and refined by full-matrix least-squares methods against  $F^2$  using SHELXL 2018/3.<sup>[3][4]</sup> All non-hydrogen atoms were refined with anisotropic displacement parameters. All hydrogen atoms were refined with isotropic displacement parameters. Some of their coordinates were refined freely and some on calculated positions using a riding model with their  $U_{\text{iso}}$  values constrained to 1.5 times the  $U_{\text{eq}}$  of their pivot atoms for terminal  $\text{sp}^3$  carbon atoms and 1.2 times for all other carbon atoms. Disordered moieties were refined using bond lengths restraints and displacement parameter restraints. Crystallographic data for the structures reported in this paper have been deposited with the Cambridge Crystallographic Data Centre.<sup>[5]</sup> CCDC 2493250 contains the supplementary crystallographic data for this paper. These data can be obtained free of charge from The Cambridge Crystallographic Data Centre via [www.ccdc.cam.ac.uk/structures](http://www.ccdc.cam.ac.uk/structures). This report and the CIF file were generated using FinalCif.<sup>[6]</sup>

**Table S1.** Crystal data and details of the structure determination of compound  $[\text{Na}(\text{crypt-222})]_4[\text{Pd}_2\text{P}_{14}]$ .

| Compound                                                 | [Na(crypt-222)] <sub>4</sub> [Pd <sub>2</sub> P <sub>14</sub> ]                                                 |
|----------------------------------------------------------|-----------------------------------------------------------------------------------------------------------------|
| CCDC number                                              | 2493250                                                                                                         |
| Empirical formula                                        | C <sub>72</sub> H <sub>144</sub> N <sub>8</sub> Na <sub>4</sub> O <sub>24</sub> P <sub>14</sub> Pd <sub>2</sub> |
| Formula weight                                           | 2244.28                                                                                                         |
| Temperature [K]                                          | 150.00                                                                                                          |
| Crystal system                                           | triclinic                                                                                                       |
| Space group (number)                                     | $P\bar{1}$                                                                                                      |
| $a$ [Å]                                                  | 13.1373(4)                                                                                                      |
| $b$ [Å]                                                  | 13.3017(4)                                                                                                      |
| $c$ [Å]                                                  | 16.1154(5)                                                                                                      |
| $\alpha$ [°]                                             | 105.8900(10)                                                                                                    |
| $\beta$ [°]                                              | 91.8060(10)                                                                                                     |
| $\gamma$ [°]                                             | 112.9760(10)                                                                                                    |
| Volume [Å <sup>3</sup> ]                                 | 2463.02(13)                                                                                                     |
| $Z$                                                      | 1                                                                                                               |
| $\rho_{\text{calc}}$ [gcm <sup>-3</sup> ]                | 1.513                                                                                                           |
| $\mu$ [mm <sup>-1</sup> ]                                | 0.681                                                                                                           |
| $F(000)$                                                 | 1170                                                                                                            |
| Crystal size [mm <sup>3</sup> ]                          | 0.2×0.3×0.5                                                                                                     |
| Crystal colour                                           | metallic reddish red                                                                                            |
| Crystal shape                                            | block                                                                                                           |
| Radiation                                                | MoK $_{\alpha}$ ( $\lambda$ =0.71073 Å)                                                                         |
| 2 $\theta$ range [°]                                     | 4.64 to 69.79 (0.62 Å)                                                                                          |
| Index ranges                                             | $-21 \leq h \leq 18$<br>$-20 \leq k \leq 19$<br>$-25 \leq l \leq 24$                                            |
| Reflections collected                                    | 199874                                                                                                          |
| Independent reflections                                  | 19812<br>$R_{\text{int}} = 0.0474$<br>$R_{\text{sigma}} = 0.0254$                                               |
| Completeness to<br>$\theta = 25.242^\circ$               | 99.6 %                                                                                                          |
| Data / Restraints / Parameters                           | 19812 / 0 / 599                                                                                                 |
| Absorption correction T <sub>min</sub> /T <sub>max</sub> | 0.7830 / 0.8730 (multi-scan)                                                                                    |

|                                                 |                                   |
|-------------------------------------------------|-----------------------------------|
| (method)                                        |                                   |
| Goodness-of-fit on $F^2$                        | 1.073                             |
| Final $R$ indexes<br>[ $I \geq 2\sigma(I)$ ]    | $R_1 = 0.0278$<br>$wR_2 = 0.0740$ |
| Final $R$ indexes<br>[all data]                 | $R_1 = 0.0368$<br>$wR_2 = 0.0817$ |
| Largest peak/hole [ $\text{e}\text{\AA}^{-3}$ ] | 0.72/−0.90                        |

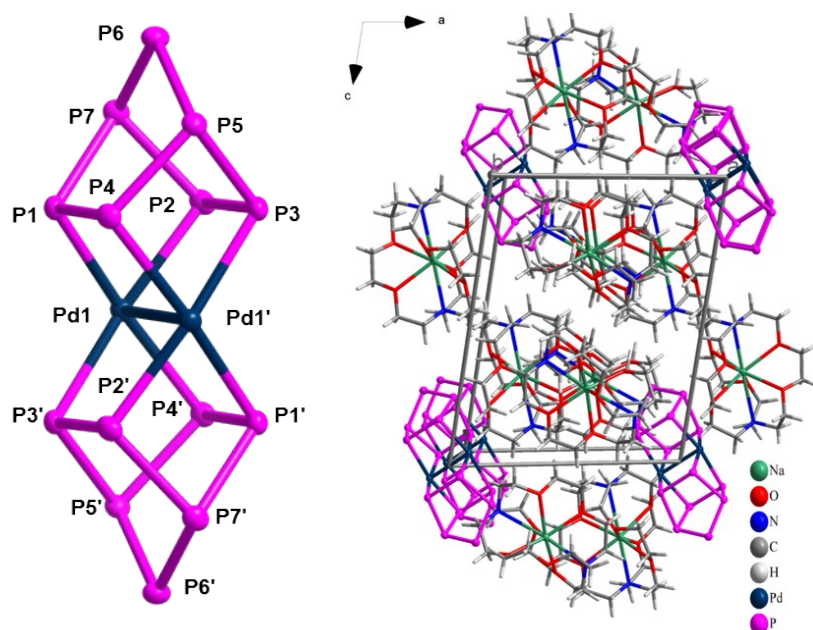

**Figure S2.** Molecular structure of the anion  $[\text{Pd}_2\text{P}_{14}]^{4-}$  in compound  $[\text{Na}(\text{crypt-222})]_4[\text{Pd}_2\text{P}_{14}]$  (left) and unit cell view of  $[\text{Na}(\text{crypt-222})]_4[\text{Pd}_2\text{P}_{14}]$  (right).

**Table S2.** Selected bond lengths (in  $\text{\AA}$ ) and bond angles (in degrees) of the experimental structure of the anion in  $[\text{Na}(\text{crypt-222})]_4[\text{Pd}_2\text{P}_{14}]$ .

| Atom–Atom | Length [ $\text{\AA}$ ] (exp.) |
|-----------|--------------------------------|
| Pd1–Pd1'  | 2.69687(19)                    |
| Pd1–P1    | 2.3954(4)                      |
| Pd1–P2    | 2.3778(4)                      |
| Pd1–P3'   | 2.3873(4)                      |
| Pd1–P4'   | 2.4006(4)                      |
| P1–P4     | 2.1961(5)                      |
| P1–P7     | 2.2199(5)                      |
| P2–P3     | 2.2123(5)                      |
| P2–P7     | 2.2054(5)                      |
| P3–P5     | 2.2038(5)                      |
| P4–P5     | 2.2100(5)                      |
| P5–P6     | 2.1430(5)                      |
| P6–P7     | 2.1432(5)                      |

| Atom–Atom–Atom | Angle [°]   |
|----------------|-------------|
| P1–Pd1–P4'     | 168.002(12) |
| P2–Pd1–Pd1'    | 82.247(10)  |
| P2–Pd1–P1      | 74.227(12)  |
| P2–Pd1–P3'     | 168.293(13) |
| P2–Pd1–P4'     | 103.829(13) |
| P3'–Pd1–Pd1'   | 86.059(10)  |
| P3'–Pd1–P4'    | 74.460(12)  |
| P4'–Pd1–Pd1'   | 84.972(10)  |
| P4–P1–Pd1      | 97.320(16)  |
| P4–P1–P7       | 103.259(19) |
| P7–P1–Pd1      | 97.962(16)  |
| P3–P2–Pd1      | 98.410(16)  |
| P7–P2–Pd1      | 98.893(17)  |
| P7–P2–P3       | 103.144(19) |
| P2–P3–Pd1'     | 93.277(15)  |
| P5–P3–Pd1'     | 99.326(16)  |
| P5–P3–P2       | 102.905(19) |
| P1–P4–P5       | 103.109(18) |
| P5–P4–Pd1'     | 98.745(16)  |
| P3–P5–P4       | 82.039(17)  |
| P6–P5–P3       | 107.78(2)   |
| P6–P5–P4       | 108.40(2)   |
| P5–P6–P7       | 96.853(19)  |
| P2–P7–P1       | 81.210(17)  |
| P6–P7–P1       | 107.84(2)   |
| P6–P7–P2       | 108.08(2)   |

Symmetry transformations used to generate equivalent atoms:

': -X, 2-Y, 2-Z;

### 3 Energy Dispersive Spectrometer (EDS)

EDS analysis of single crystal of compound [Na(crypt-222)]<sub>4</sub>[Pd<sub>2</sub>P<sub>14</sub>] was carried out using a Oxford X-Max 80 instrument (UK). The spectra are shown in Figure S3. Several measurements produced unreasonably large values for the % Na. Removal of Na from the calculations afforded excellent agreement with the expected atomic ratio of close to Pd<sub>2.00</sub>P<sub>14.00</sub>. We believe that accumulation of Na at the crystal surface upon exposure to air is responsible for the anomalous results. This is observed commonly for very these very air-sensitive compounds.

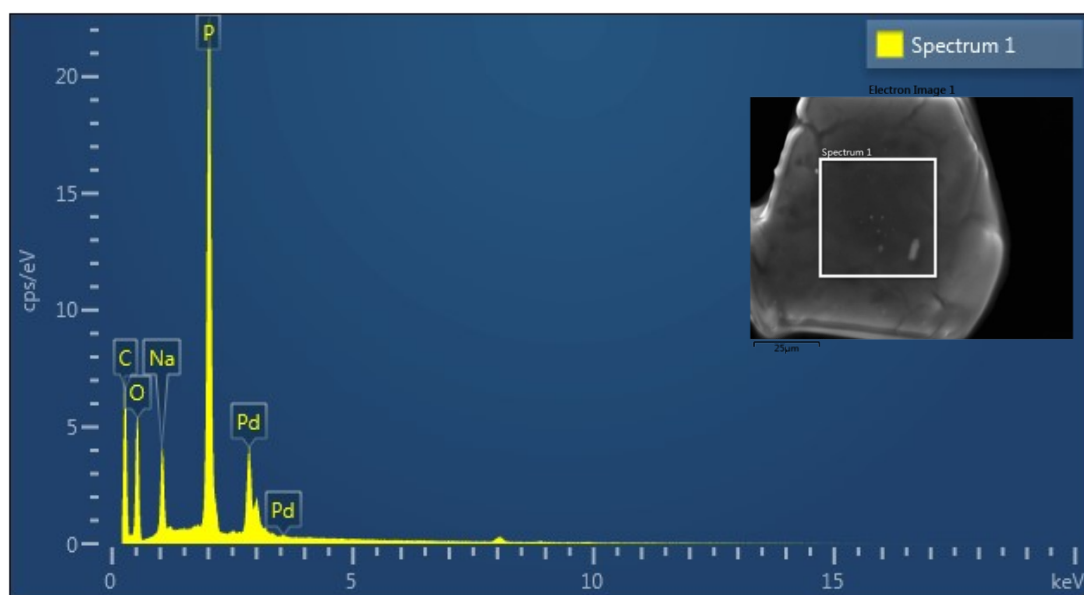

Figure S3. EDS analysis of  $[\text{Na}(\text{crypt-222})]_4[\text{Pd}_2\text{P}_{14}]$ .

#### 4 References for the Supporting Information

- [1] 4,7,13,16,21,24-Hexaoxa-1,10-diazabicyclo[8.8.8]hexacosane.
- [2] Santandrea, R. P.; Mensing, C.; von Schnering, H. G. *Thermo chim. Acta* **1986**, 98, 301.
- [3] G. M. Sheldrick, *Acta Cryst.* **2015**, A71, 3–8.
- [4] G. M. Sheldrick, *Acta Cryst.* **2015**, C71, 3–8.
- [5] C. R. Groom, I. J. Bruno, M. P. Lightfoot, S. C. Ward, *Acta Cryst.* **2016**, B72, 171–179.
- [6] D. Kratzert, *FinalCif*, V154, <https://dkratzert.de/finalcif.html>.
